# Supplementary material for: Association Between Premature Menopause and Cardiovascular Diseases and All‐Cause Mortality in Korean Women
Source: PubMed Central journal article supplement — J Am Heart Assoc. 2023 Nov 10;12(22):e030117. doi: 10.1161/JAHA.123.030117 (PMC10727283; doi:10.1161/jaha.123.030117), 2023-11-10
Supplement: JAH3-12-e030117-s001.pdf [file JAH3-12-e030117-s001.pdf]

# **SUPPLEMENTAL MATERIAL**

**Table S1. The baseline characteristics of the excluded and enrolled women.**

|                           | Final Enrollment |                  |        |
|---------------------------|------------------|------------------|--------|
|                           | No               | Yes              | ASMD   |
| N                         | 251 814          | <b>1 159 405</b> |        |
| Age (years)               | 61.98±8.65       | 61.19±8.29       | 0.0939 |
| Height (cm)               | 153.28±5.78      | 153.6±5.7        | 0.0555 |
| Weight (kg)               | 56.94±8.4        | 56.98±8.25       | 0.0049 |
| BMI (kg/m <sup>2</sup> )  | 24.21±3.17       | 24.13±3.14       | 0.0246 |
| WC (cm)                   | 80.2±8.33        | 79.84±8.25       | 0.0428 |
| Fasting glucose (mg/dL)   | 99.79±24.47      | 99.29±23.73      | 0.0205 |
| SBP (mmHg)                | 126±16.46        | 125.36±16.12     | 0.0392 |
| DBP (mmHg)                | 77.02±10.28      | 76.83±10.15      | 0.0191 |
| Total cholesterol (mg/dL) | 208.02±38.74     | 208.46±38.56     | 0.0115 |
| HDL-C (mg/dL)             | 58.9±43.97       | 57.71±33.18      | 0.0306 |
| LDL-C (mg/dL)             | 125.7±39.74      | 126.01±38.16     | 0.0082 |
| Triglyceride (mg/dL)      | 134.16±82.23     | 132.42±78.45     | 0.0216 |
| Creatinine (mg/dL)        | 0.95±1.2         | 0.88±0.85        | 0.0693 |
| eGFR                      | 81.63±29.11      | 82.39±28.11      | 0.0263 |
| Ever smoking (yes,%)      | 11424(4.68)      | 42939(3.7)       | 0.0487 |
| Alcohol drinking (yes,%)  | 30819(13.13)     | 146614(12.65)    | 0.0143 |
| Regular exercise (yes,%)  | 40240(17.2)      | 215488(18.59)    | 0.0361 |
| Income (Q1)               | 49588(19.69)     | 252720(21.8)     | 0.0519 |
| Obesity (yes,%)           | 95077(37.82)     | 423961(36.57)    | 0.0259 |
| Abdominal obesity (yes,%) | 70724(28.79)     | 314448(27.12)    | 0.0372 |
| Diabetes mellitus (yes,%) | 31898(12.68)     | 138460(11.94)    | 0.0225 |
| Hypertension (yes,%)      | 113239(45.03)    | 499928(43.12)    | 0.0385 |
| Dyslipidemia (yes,%)      | 78357(31.17)     | 362255(31.24)    | 0.0016 |
| CKD (yes,%)               | 30426(12.39)     | 128314(11.07)    | 0.0410 |

The reported values are based on the answers provided on the questionnaire.

Among the participants who had missing data in the general health screening questionnaire (123 629, Figure 1) and in the National Cancer Screening Program questions (216 808, Figure 1), those who still had regular menstrual cycles at the time of the screening and those with a history MI or ischemic stroke were excluded. Finally, a total of 251 814 women were selected for further analyses.

N, number; ASMD, Absolute Standardized Mean Difference; BMI, body mass index; WC, Waist Circumference; SBP, systolic blood pressure; DBP, diastolic blood pressure; HDL-C, high-density lipoprotein cholesterol; LDL-C, low-density lipoprotein cholesterol; eGFR, estimated glomerular filtration rate; CKD, Chronic Kidney Disease.

**Table S2. The primary outcomes in the excluded and enrolled women.**

| Final Enrollment           | N              | Event | Duration   | IR   | HR (95% CI)        |
|----------------------------|----------------|-------|------------|------|--------------------|
| <b>MI</b>                  |                |       |            |      |                    |
| No*                        | 251814         | 7274  | 2530485.9  | 2.87 | 1(Ref.)            |
| Yes                        | <b>1159405</b> | 31606 | 11684061.8 | 2.71 | 1.007(0.982,1.033) |
| p-value                    |                |       |            |      | <b>0.5794</b>      |
| <b>Ischemic stroke</b>     |                |       |            |      |                    |
| No*                        | 251814         | 10743 | 2512375.7  | 4.28 | 1(Ref.)            |
| Yes                        | <b>1159405</b> | 45052 | 11613349.3 | 3.88 | 0.99(0.969,1.011)  |
| p-value                    |                |       |            |      | <b>0.3535</b>      |
| <b>All-cause mortality</b> |                |       |            |      |                    |
| No*                        | 251814         | 19584 | 2555723.5  | 7.66 | 1(Ref.)            |
| Yes                        | <b>1159405</b> | 77680 | 11795479.3 | 6.59 | 0.985(0.97,1.001)  |
| p-value                    |                |       |            |      | <b>0.0676</b>      |

Model was adjusted for age.

Incidence rate in 1,000 person-years.

N, number; IR, incidence rate; HR, hazard ratio; CI, confidence interval; MI, myocardial infarction

\*Among the participants who had missing data in the general health screening questionnaire (123 629, Figure 1) and in the National Cancer Screening Program questions (216 808, Figure 1), those who still had regular menstrual cycles at the time of the screening and those with a history MI or ischemic stroke were excluded. Finally, a total of 251 814 women were selected for further analyses.

**Table S3. The hazard ratio for the primary outcomes in the total participants and the respective E values.**

| PM                           | N       | Event | Duration | IR    | Model 1                | Model 2                | Model 3                | Model 4                | E-value     |             |
|------------------------------|---------|-------|----------|-------|------------------------|------------------------|------------------------|------------------------|-------------|-------------|
|                              |         |       |          |       |                        |                        |                        |                        | Point       | Lower       |
| <b>Myocardial Infarction</b> |         |       |          |       |                        |                        |                        |                        | <b>2.02</b> | <b>1.82</b> |
| No                           | 1139406 | 30721 | 11485997 | 2.67  | 1(Ref.)                | 1(Ref.)                | 1(Ref.)                | 1(Ref.)                |             |             |
| Yes                          | 19999   | 885   | 198064.8 | 4.47  | 1.672<br>(1.564,1.788) | 1.369<br>(1.28,1.464)  | 1.347<br>(1.26,1.441)  | 1.342<br>(1.255,1.435) |             |             |
| <b>Ischemic Stroke</b>       |         |       |          |       |                        |                        |                        |                        | <b>1.7</b>  | <b>1.53</b> |
| No                           | 1139406 | 43866 | 11417053 | 3.84  | 1(Ref.)                | 1(Ref.)                | 1(Ref.)                | 1(Ref.)                |             |             |
| Yes                          | 19999   | 1186  | 196296.5 | 6.04  | 1.574<br>(1.486,1.668) | 1.223<br>(1.154,1.296) | 1.21<br>(1.142,1.282)  | 1.203<br>(1.135,1.275) |             |             |
| <b>All-cause mortality</b>   |         |       |          |       |                        |                        |                        |                        | <b>1.59</b> | <b>1.46</b> |
| No                           | 1139406 | 75479 | 11594348 | 6.51  | 1(Ref.)                | 1(Ref.)                | 1(Ref.)                | 1(Ref.)                |             |             |
| Yes                          | 19999   | 2201  | 201131.2 | 10.94 | 1.679<br>(1.61,1.752)  | 1.184<br>(1.135,1.235) | 1.165<br>(1.117,1.216) | 1.158<br>(1.11,1.209)  |             |             |

Incidence rate in 1,000 person-years.

Model 1: none

Model 2: age

Model 3: age, ever smoking, alcohol drinking, regular exercise, and income (Q1)

Model 4: age, ever smoking, alcohol drinking, regular exercise, income (Q1), BMI, type 2 diabetes, hypertension, dyslipidemia, eGFR < 60 mL/min/1.73 m<sup>2</sup>, and HRT

In order to address the possibility of unmeasured confounding in Table 1, the E-values are presented in Table S3. The E-values indicate that it is less likely that the current study had the unmeasured variables that could affect the outcomes.

PM, premature menopause; N, number; IR, incidence rate; Ref, reference; Q1, lowest quartile; BMI, body mass index; HRT, hormone replacement therapy.
